# Supplementary material
Source: HighWire-hosted journal article supplement (http://www.qdcxjkg.com/highwire/filestream/113577/field_highwire_adjunct_files/0/erj-02236-2011.r2_online_data_supplement_clean_copy.pdf)
Supplement: erj-02236-2011.r2_online_data_supplement_clean_copy.pdf [file erj-02236-2011.r2_online_data_supplement_clean_copy.pdf]

# **Dynamic respiratory mechanics and exertional dyspnoea in pulmonary arterial hypertension**

## **Authors:**

Pierantonio Laveneziana, Gilles Garcia, Barbara Joureau, Fadia Nicolas-Jilwan, Toufik Brahim, Louis Laviolette, Olivier Sitbon, Gérald Simonneau, Marc Humbert, Thomas Similowski.

## **ONLINE DATA SUPPLEMENT**

### **METHODS**

#### **Patients and controls**

We studied 25 consecutive clinically stable patients with idiopathic or heritable PAH [1], diagnosed according to the current evidence-based clinical practice guidelines [2, 3]. Patients were included in the study irrespective of the treatment received, if they had been clinically stable during the 3 preceding months, and if they were scheduled for CPET within the frame of their clinical follow-up at the reference center. Exclusion criteria were: 1) past or current tobacco-smoking history; 2) spirometric evidence of an obstructive ventilatory defect as defined by a reduced FEV<sub>1</sub>/VC ratio below the 5<sup>th</sup> percentile of the predicted value [4]; 3) body mass index (BMI) >30 kg.m<sup>-2</sup>; 4) use of supplemental oxygen; 5) PAH induced by drugs and toxins; 6) PAH associated with other conditions, including connective tissue diseases, congenital heart diseases, portal hypertension, and HIV infection [1]; 7) chronic thromboembolic pulmonary hypertension [1]; 8) other respiratory, cardiac and other diseases that could contribute to dyspnoea or exercise limitation; or 9) contraindications to clinical exercise testing [5].

#### **Procedures**

Pulmonary function tests were performed using automated equipment (Masterscreen MS Body and Diffusion, tyb B/IEC 601-1/IP20, Jaeger, Germany) according to recommended standards [6-8]. Measurements were expressed as percentages of predicted normal values [9]; predicted

inspiratory capacity (IC) was calculated as predicted total lung capacity (TLC) minus predicted functional residual capacity (FRC). Symptom-limited incremental CPETs were conducted on an electrically braked cycle ergometer (Ergoline 100P mitBD; Medisoft, Sorinnes, Belgium) with a cardiopulmonary exercise testing system (Ergocard model E, Medisoft, Sorinnes, Belgium). To ensure safety, oxygen saturation ( $SpO_2$ ), heart rate (HR), cardiac rhythm and ST-segment changes, and blood pressure (indirect sphygmomanometry) were evaluated at rest and throughout exercise testing. Breath-by-breath cardiopulmonary and metabolic data were collected at baseline and throughout exercise while subjects breathed through a mouthpiece with nasal passages occluded by a nose-clip. Exercise variables were measured and averaged over the last 20 seconds of each minute and at peak exercise. Exercise variables were compared with the predicted normal values of Jones [10]. Maximum ventilatory capacity (MVC) was estimated as  $35 \times FEV_1$  [11]. Measurements of arterial partial pressure of  $CO_2$  ( $PaCO_2$ , Torr) were obtained at rest and at peak exercise only in PAH patients. The physiological dead space-to-tidal volume ratio ( $V_D/V_T$ ) and the gradient between arterial and end-tidal carbon dioxide partial pressure [ $P(a-ET)CO_2$ ] were also calculated [12].

## TABLES

**Table 1. Specific pulmonary arterial hypertension (PAH) pharmacotherapy in patients who developed dynamic lung hyperinflation (PAH-H) during exercise and in those who did not (PAH-NH)**

|                                             | <b>PAH-H (n = 15)</b> | <b>PAH-NH (n = 10)</b> |
|---------------------------------------------|-----------------------|------------------------|
| Oral anticoagulants                         | 11                    | 5                      |
| Diuretics                                   | 10                    | 3                      |
| Digoxin                                     | 0                     | 0                      |
| <b>Calcium channel blockers</b>             | 3                     | 3                      |
| <b>Prostanoids:</b>                         |                       |                        |
| <i>Epoprostenol</i>                         | 6                     | 1                      |
| <i>Iloprost</i>                             | 0                     | 0                      |
| <i>Treprostinil (IV)</i>                    | 2                     | 1                      |
| <i>Beraprost</i>                            | 0                     | 0                      |
| <b>Endothelin receptor antagonists:</b>     |                       |                        |
| <i>Bosentan</i>                             | 10                    | 6                      |
| <i>Sitaxentan</i>                           | 0                     | 0                      |
| <i>Ambrisentan</i>                          | 0                     | 0                      |
| <b>Phosphodiesterase type-5 inhibitors:</b> |                       |                        |
| <i>Sildenafil</i>                           | 9                     | 6                      |
| <i>Tadalafil</i>                            | 1                     | 0                      |

## REFERENCES

1. Simonneau G, Robbins IM, Beghetti M, Channick RN, Delcroix M, Denton CP, Elliott CG, Gaine SP, Gladwin MT, Jing ZC, Krowka MJ, Langleben D, Nakanishi N, Souza R. Updated clinical classification of pulmonary hypertension. *J Am Coll Cardiol* 2009; 54(1 Suppl): S43-54.
2. Badesch DB, Champion HC, Sanchez MA, Hoeper MM, Loyd JE, Manes A, McGoon M, Naeije R, Olschewski H, Oudiz RJ, Torbicki A. Diagnosis and assessment of pulmonary arterial hypertension. *J Am Coll Cardiol* 2009; 54(1 Suppl): S55-66.
3. Galie N, Hoeper MM, Humbert M, Torbicki A, Vachiery JL, Barbera JA, Beghetti M, Corris P, Gaine S, Gibbs JS, Gomez-Sanchez MA, Jondeau G, Klepetko W, Opitz C, Peacock A, Rubin L, Zellweger M, Simonneau G. Guidelines for the diagnosis and treatment of pulmonary hypertension. *Eur Respir J* 2009; 34(6): 1219-1263.
4. Pellegrino R, Viegi G, Brusasco V, Crapo RO, Burgos F, Casaburi R, Coates A, van der Grinten CP, Gustafsson P, Hankinson J, Jensen R, Johnson DC, MacIntyre N, McKay R, Miller MR, Navajas D, Pedersen OF, Wanger J. Interpretative strategies for lung function tests. *Eur Respir J* 2005; 26(5): 948-968.
5. Palange P, Ward SA, Carlsen KH, Casaburi R, Gallagher CG, Gosselink R, O'Donnell DE, Puente-Maestu L, Schols AM, Singh S, Whipp BJ. Recommendations on the use of exercise testing in clinical practice. *Eur Respir J* 2007; 29(1): 185-209.
6. Miller MR, Hankinson J, Brusasco V, Burgos F, Casaburi R, Coates A, Crapo R, Enright P, van der Grinten CP, Gustafsson P, Jensen R, Johnson DC, MacIntyre N, McKay R, Navajas D, Pedersen OF, Pellegrino R, Viegi G, Wanger J. Standardisation of spirometry. *Eur Respir J* 2005; 26(2): 319-338.
7. Wanger J, Clausen JL, Coates A, Pedersen OF, Brusasco V, Burgos F, Casaburi R, Crapo R, Enright P, van der Grinten CP, Gustafsson P, Hankinson J, Jensen R, Johnson D, Macintyre N, McKay R, Miller MR, Navajas D, Pellegrino R, Viegi G. Standardisation of the measurement of lung volumes. *Eur Respir J* 2005; 26(3): 511-522.
8. Macintyre N, Crapo RO, Viegi G, Johnson DC, van der Grinten CP, Brusasco V, Burgos F, Casaburi R, Coates A, Enright P, Gustafsson P, Hankinson J, Jensen R, McKay R, Miller MR, Navajas D, Pedersen OF, Pellegrino R, Wanger J. Standardisation of the single-breath determination of carbon monoxide uptake in the lung. *Eur Respir J* 2005; 26(4): 720-735.
9. Quanjer PH, Tammeling GJ, Cotes JE, Pedersen OF, Peslin R, Yernault JC. Lung volumes and forced ventilatory flows. Report Working Party Standardization of Lung Function Tests, European Community for Steel and Coal. Official Statement of the European Respiratory Society. *Eur Respir J Suppl* 1993; 16: 5-40.
10. Jones NL. Clinical exercise testing. 3rd ed. WB Saunders, Philadelphia, 1988.
11. Gandevia B, Hugh-Jones P. Terminology for measurements of ventilatory capacity; a report to the thoracic society. *Thorax* 1957; 12(4): 290-293.
12. Laveneziana P, Valli G, Onorati P, Paoletti P, Ferrazza AM, Palange P. Effect of heliox on heart rate kinetics and dynamic hyperinflation during high-intensity exercise in COPD. *Eur J Appl Physiol* 2011; 111(2): 225-234.
